# Supplementary material for: Multiresidue analysis of pesticides in peanuts using modified QuEChERS sample preparation and liquid chromatography-mass spectrometry detection
Source: Royal Society of Chemistry journal article supplement (doi:10.1039/c5ay00331h), 2015-01-01
Supplement: c5ay00331h1.pdf [file c5ay00331h1.pdf]

**Table 1.** Retention time windows (RTWs) and MS/MS conditions for each compound

| Compound            | RTWs, min   | Precursor ion                       | Quantification transition<br>(CE <sup>a</sup> , V; CXP <sup>b</sup> , V) | Confirmation transition<br>(CE <sup>a</sup> , V; CXP <sup>b</sup> , V) | Declustering Potential<br>(V) |
|---------------------|-------------|-------------------------------------|--------------------------------------------------------------------------|------------------------------------------------------------------------|-------------------------------|
| Alachlor            | 5.55-5.75   | [M + H] <sup>+</sup>                | 270.1 > 238.0 (15, 22)                                                   | 270.1 > 162.1 (27,14)                                                  | 76                            |
| Aldicarb sulfone    | 0.50-0.53   | [M + H] <sup>+</sup>                | 223.1 > 86.1 (21, 8)                                                     | 223.1 > 76.1 (11, 8)                                                   | 101                           |
| Aldicarb sulfoxide  | 0.47-0.50   | [M + H] <sup>+</sup>                | 207.1 > 132.0 (9, 12)                                                    | 207.1 > 89.0 (21, 8)                                                   | 86                            |
| Ametrine            | 4.20-4.40   | [M + H] <sup>+</sup>                | 228.0 > 186.0 (25, 16)                                                   | 228.0 > 116.0 (35, 10)                                                 | 71                            |
| Avermectin B1a      | 10.08-10.60 | [M + NH <sub>4</sub> ] <sup>+</sup> | 890.5 > 305.2 (33, 28)                                                   | 890.5 > 145.1 (53, 28)                                                 | 91                            |
| Azinphos ethyl      | 5.07-5.33   | [M + H] <sup>+</sup>                | 346.0 > 132.2 (23, 12)                                                   | 346.0 > 160.2 (15, 12)                                                 | 76                            |
| Azinphos methyl     | 3.34-3.52   | [M + H] <sup>+</sup>                | 318.1 > 132.1 (23, 12)                                                   | 318.1 > 261.1 (9, 24)                                                  | 106                           |
| Azoxystrobin        | 3.99-4.20   | [M + H] <sup>+</sup>                | 404.1 > 371.9 (21, 34)                                                   | 404.1 > 343.9 (29, 34)                                                 | 101                           |
| Benalaxyl           | 6.21-6.52   | [M + H] <sup>+</sup>                | 326.0 > 148.0 (31, 12)                                                   | 326.0 > 294.0 (15, 28)                                                 | 81                            |
| BF 500-3            | 6.42-6.75   | [M + NH <sub>4</sub> ] <sup>+</sup> | 358.0 > 132.1 (41, 12)                                                   | 358.0 > 164.0 (19, 16)                                                 | 56                            |
| Bitertanol          | 6,42-6,75   | [M + NH <sub>4</sub> ] <sup>+</sup> | 358.0 > 132.1 (41,12)                                                    | 358.0 > 164.0 (12,16)                                                  | 56                            |
| Boscalid            | 4.36-4.92   | [M + H] <sup>+</sup>                | 343.0 > 307.0 (27, 28)                                                   | 343.0 > 139.9 (27, 28)                                                 | 126                           |
| Buprofezin          | 8.15-8.30   | [M + H] <sup>+</sup>                | 306.2 > 201.1 (17, 18)                                                   | 306.2 > 116.0 (21, 10)                                                 | 56                            |
| Cadusafos           | 7.17-7.30   | [M + H] <sup>+</sup>                | 271,1 > 159.0 (19, 18)                                                   | 271,1 > 215.0 (13, 10)                                                 | 76                            |
| Carbaryl            | 1.95-2.05   | [M + H] <sup>+</sup>                | 202.2 > 145.1 (15, 14)                                                   | 202.2 > 127.1 (39, 12)                                                 | 66                            |
| Carbendazim         | 0.95-1.00   | [M + H] <sup>+</sup>                | 192.0 > 160.1 (25, 14)                                                   | 192.0 > 132.1 (41, 12)                                                 | 56                            |
| Carbofuran          | 1.75-1.84   | [M + H] <sup>+</sup>                | 222.1 > 165.2 (17, 2)                                                    | 222.1 > 123.0 (29, 2)                                                  | 70                            |
| Carpropamid         | 6.32-6.46   | [M - H] <sup>-</sup>                | 334,0 > 139.0 (25, 12)                                                   | 334,0 > 139.0 (59, 10)                                                 | 81                            |
| Chlorfenvinphos     | 6.53-6.86   | [M + H] <sup>+</sup>                | 359.9 > 155,0 (21, 26)                                                   | 359.9 > 99,2 (31, 22)                                                  | 56                            |
| Chlorpyrifos methyl | 6,77-7,12   | [M + H] <sup>+</sup>                | 321,9 > 125,0 (27,0)                                                     | 321,9 > 289,8 (23,0)                                                   | 106                           |
| Ciflufenamide       | 7,02-7,16   | [M + H] <sup>+</sup>                | 413.1 > 294.9 (21, 26)                                                   | 413.1 > 241.0 (31, 22)                                                 | 56                            |
| Clorbufan           | 7.02-7.16   | [M + H] <sup>+</sup>                | 241.1 > 172.0 (17, 16)                                                   | 241.1 > 154.0 (29, 14)                                                 | 51                            |
| Cloroxuron          | 4.68-4.92   | [M + H] <sup>+</sup>                | 291.2 > 72.0 (53, 8)                                                     | 291.2 > 218.0 (33, 20)                                                 | 91                            |
| Cyazofamid          | 5.25-5.52   | [M + H] <sup>+</sup>                | 324.9 > 108.0 (19, 10)                                                   | 324.9 > 261.0 (13, 24)                                                 | 66                            |
| Cyhalofop-butyl     | 7.42-7.52   | [M + NH <sub>4</sub> ] <sup>+</sup> | 375.1 > 256.0 (23, 22)                                                   | 375.1 > 120.0 (41, 10)                                                 | 61                            |
| Cyproconazole       | 4.74-5.00   | [M + H] <sup>+</sup>                | 292.1 > 70.1 (23, 6)                                                     | 292.1 > 125.0 (37, 12)                                                 | 81                            |

|                    |           |                                     |                        |                        |     |
|--------------------|-----------|-------------------------------------|------------------------|------------------------|-----|
| Cyprodinil         | 5.98-6.28 | [M + H] <sup>+</sup>                | 226.1>92.9 (45, 34)    | 226.1>76.9 (63, 34)    | 71  |
| Desmedipham        | 3.35-3.60 | [M + NH <sub>4</sub> ] <sup>+</sup> | 318.1 > 182.0 (19, 16) | 318,1 > 182.0 (37, 12) | 46  |
| Diazinon           | 6.32-6.65 | [M + H] <sup>+</sup>                | 305.1>97.0 (49, 10)    | 305.1>169.1 (31, 16)   | 71  |
| Dicrotophos        | 0.47-0.83 | [M + H] <sup>+</sup>                | 238.1 > 112.0 (17, 10) | 238,1 > 193.0 (23, 18) | 71  |
| Difenoconazole     | 6.63-6.97 | [M + H] <sup>+</sup>                | 406.1>250.9 (35, 24)   | 406.1>337.2 (23, 24)   | 96  |
| Diflufenicam       | 7.40-7.52 | [M + H] <sup>+</sup>                | 395.1 > 266.0 (35, 24) | 395.1 > 246 (51, 22)   | 141 |
| Diniconazole       | 6.86-7.00 | [M + H] <sup>+</sup>                | 326.1 > 70.0 (59, 12)  | 326.1 > 70.0 (61, 8)   | 76  |
| Disulfoton         | 6,64-6,99 | [M + H] <sup>+</sup>                | 275,1 > 89,1 (19, 8)   | 275,1 > 61,1 (45, 10)  | 66  |
| Disulfoton sulfone | 2.57-2.71 | [M + H] <sup>+</sup>                | 307.0>153.0 (17, 14)   | 307.0>171.0 (17, 14)   | 91  |
| Diuron             | 3,00-3,20 | [M + H] <sup>+</sup>                | 233,1 > 72,0 (23, 8)   | 233,1 > 159,9 (35, 14) | 81  |
| Ethiprole          | 4,36-4,55 | [M + H] <sup>+</sup>                | 397,0 > 350,9 (29, 30) | 397,0 > 254,9 (47, 22) | 156 |
| Ethofumesate       | 3.93-4.14 | [M + NH <sub>4</sub> ] <sup>+</sup> | 304.1>121.1 (29, 12)   | 304.1>161.2 (31, 12)   | 71  |
| Ethoprofos         | 5.29-5.57 | [M + H] <sup>+</sup>                | 243.1>131.0 (27, 12)   | 243.1>96.9 (41, 10)    | 91  |
| Ethyl cinidon      | 7,68-8,10 | [M + NH <sub>4</sub> ] <sup>+</sup> | 410,9 > 347,9 (31,0)   | 410,9 > 365,9 (25,0)   | 51  |
| Etione             | 7.93-8.34 | [M + H] <sup>+</sup>                | 385.0>199.1 (15, 18)   | 385.0>171.0 (23, 18)   | 91  |
| Etrimfos           | 5.98-6.29 | [M + H] <sup>+</sup>                | 293.1>125.0 (33, 12)   | 293.1>265.1 (21, 12)   | 66  |
| Fenamidone         | 4.26-4.48 | [M + H] <sup>+</sup>                | 312.1>92.1 (35, 8)     | 312.1>236.1 (19, 22)   | 71  |
| Fenamiphos         | 5.58-5.87 | [M + H] <sup>+</sup>                | 304.1>217.1 (29, 20)   | 304.1>202.0 (45, 20)   | 11  |
| Fenarimol          | 5.07-5.34 | [M + H] <sup>+</sup>                | 330.9>268.0 (31, 24)   | 330.9>139.0 (47, 12)   | 101 |
| Fenhexamide        | 5.13-5.40 | [M + H] <sup>+</sup>                | 302.1>97.2 (31, 10)    | 302.1>55.1 (55, 8)     | 116 |
| Fenthion           | 5.97-6.28 | [M + H] <sup>+</sup>                | 279.0>247.0 (19, 22)   | 279.0>169.0 (25, 14)   | 58  |
| Fluasifop-p-butyl  | 7.75-8.15 | [M + H] <sup>+</sup>                | 384.1 > 282.0 (29,0)   | 384.1 > 328.0 (23,0)   | 116 |
| Fluzilazol         | 5.88-6.02 | [M + H] <sup>+</sup>                | 316.1 > 247.0 (25, 22) | 316.1 > 165.1 (37, 14) | 86  |
| Furathiocarb       | 7.64-8.04 | [M + H] <sup>+</sup>                | 383.2> 195.2 (17, 3)   | 383.2> 252.2 (24, 3)   | 72  |
| Imazalil           | 5.92-6.23 | [M + H] <sup>+</sup>                | 297.0>159.0 (29, 14)   | 297.0>200.9 (23, 14)   | 81  |
| Indoxacarb         | 7.15-7.52 | [M + H] <sup>+</sup>                | 528.0>203.1 (59, 18)   | 528.0>150.1 (31, 14)   | 136 |
| Iprovalicarb       | 5.14-5.41 | [M + H] <sup>+</sup>                | 321.2>203.2 (23, 3)    | 321.2>119.0 (12, 2)    | 61  |
| Isoproturon        | 2.86-3.01 | [M + H] <sup>+</sup>                | 207.3>72.1 (23, 8)     | 207.3>165.1 (19, 14)   | 71  |
| Kresoxim methyl    | 5.95-6.26 | [M + H] <sup>+</sup>                | 314.1 > 222.1 (21,0)   | 314.1 > 116.0 (19,0)   | 76  |
| Linuron            | 3.71-3.90 | [M + H] <sup>+</sup>                | 249.1>159.2 (25, 4)    | 249.1>182.0 (21, 4)    | 76  |
| Malathion          | 4.48-4.72 | [M + H] <sup>+</sup>                | 330.9>127.1 (17, 12)   | 330.9>285.1 (11, 26)   | 111 |

|                   |           |                                     |                        |                        |          |
|-------------------|-----------|-------------------------------------|------------------------|------------------------|----------|
| Metazachlor       | 2.89-3.04 | [M + H] <sup>+</sup>                | 278.1>134.1 (29, 12)   | 278.1>210.1 (15, 18)   | 51       |
| Methidation       | 3.15-3.32 | [M + H] <sup>+</sup>                | 303.0>145.0 (13, 14)   | 303.0>85.1 (29, 8)     | 86       |
| Methiocarb        | 3.90-4.10 | [M + H] <sup>+</sup>                | 226.1>169.1 (13, 14)   | 226.1>121.1 (25, 10)   | 76       |
| Methoxyfenozide   | 4.90-5.04 | [M + H] <sup>+</sup>                | 369.1 > 149.0 (23, 14) | 369.1 > 313.1 (11, 28) | 71       |
| Meticonazol       | 6,39-6,72 | [M + H] <sup>+</sup>                | 320,1 > 70,1 (59,0)    | 320,1 > 125,1 (57,0)   | 96       |
| Monocrotophos     | 0.54-0.57 | [M + H] <sup>+</sup>                | 224.1>127.0 (23, 12)   | 224.1>98.0 (17, 12)    | 71       |
| Monolinuron       | 2.16-2.28 | [M + H] <sup>+</sup>                | 215.1>125.9 (27, 12)   | 215.1>148.0 (19, 12)   | 91       |
| Myclobutanil      | 4,64-4,88 | [M + H] <sup>+</sup>                | 289,1 > 70,1 (33,0)    | 289,1 > 125,1 (39,0)   | 91       |
| Nuarimol          | 3.90-4.20 | [M + H] <sup>+</sup>                | 314.9>252.0 (31, 22)   | 314.9>81.1 (51, 8)     | 81       |
| Omethoate         | 0.44-0.47 | [M + H] <sup>+</sup>                | 214.1>183.0 (15, 16)   | 214.1>125.0 (29, 12)   | 56       |
| Oxamyl            | 0.50-0.53 | [M + NH <sub>4</sub> ] <sup>+</sup> | 237.1>72.1 (25, 8)     | 237.1>90.0 (11, 10)    | 51       |
| Paclobutrazol     | 4.48-4.72 | [M + H] <sup>+</sup>                | 294.0>70.1 (55, 6)     | 294.0>125.0 (55, 12)   | 81       |
| Pencicurom        | 6.72-7.07 | [M + H] <sup>+</sup>                | 329.0 > 125.0 (31, 12) | 329.0 > 218.0 (23, 20) | 91       |
| Penconazole       | 5.90-6.21 | [M + H] <sup>+</sup>                | 284.2>70.1 (21, 8)     | 284.2>159.0 (41, 14)   | 66       |
| Pendimethalin     | 8.15-8.57 | [M + H] <sup>+</sup>                | 282.2>212.1 (15, 20)   | 282.2>91.0 (33, 8)     | 36       |
| Phenthoate        | 5.80-6.10 | [M + H] <sup>+</sup>                | 321.0>79.1 (51, 16)    | 321.0>163.1 (17, 16)   | 96       |
| Phosalone         | 6.54-6.88 | [M + H] <sup>+</sup>                | 367.9 > 182.0 (21, 16) | 367.9 > 111.0 (57, 10) | 121      |
| Phosmet           | 3.42-3.59 | [M + H] <sup>+</sup>                | 318.0 > 133.0 (51,0)   | 318.0 > 130.1 (51,0)   | 96       |
| Picolinafen       | 7.71-8.10 | [M + H] <sup>+</sup>                | 377.2 > 238.3 (35, 14) | 377.2 > 145.0 (69, 14) | 91       |
| Pirifitalid       | 3.81-3.97 | [M + H] <sup>+</sup>                | 319.0 > 139 (37, 12)   | 319.0 > 220.1 (33, 20) | 96       |
| Pirimicarb        | 2,71-2,84 | [M + H] <sup>+</sup>                | 239,2 > 72,1 (34,0)    | 239,2 > 182,2 (21,0)   | 73       |
| Pirimiphos methyl | 6.63-6.97 | [M + H] <sup>+</sup>                | 306.1 > 164.1 (29, 14) | 319.0 > 108.1 (39, 10) | 51       |
| Prochloraz        | 6.51-6.85 | [M + H] <sup>+</sup>                | 376.0 > 308.0 (17, 28) | 376.0 > 265.9 (25, 28) | 56       |
| Propham           | 2.61-2.74 | [M+ H] <sup>+</sup>                 | 180.1 > 138.1 (13, 14) | 180.1 > 120.1 (25, 14) | 61       |
| Profenofos        | 7.42-7.81 | [M+ H] <sup>+</sup>                 | 372.9> 302.9 (25, 28)  | 372.9> 97.0 (35, 28)   | 126      |
| Promecarb         | 4.55-4.75 | [M + H] <sup>+</sup>                | 208.1 > 109.1 (23, 10) | 208.1 > 151.1 (13, 14) | 56       |
| Propaquizafop     | 8.07-8.20 | [M + H] <sup>+</sup>                | 444.1 > 370.9 (21, 34) | 446.2 > 100.0 (23, 10) | 111 / 86 |
| Propiconazole     | 6.24-6.57 | [M + H] <sup>+</sup>                | 342.1> 159.1 (37, 14)  | 342.1> 89.1 (99, 8)    | 111 / 86 |
| Propoxur          | 1.68-1.77 | [M + H] <sup>+</sup>                | 210.1 > 111.0 (19, 3)  | 210.1 > 168.1 (11, 3)  | 61       |
| Propyzamide       | 4.36-4.59 | [M + H] <sup>+</sup>                | 256.1 > 190.0 (19, 16) | 256.1 > 173.0 (31, 16) | 61       |
| Pyraclofos        | 6.84-6.94 | [M + H] <sup>+</sup>                | 361.0 > 256.9 (31, 24) | 361.0 > 111.0 (81, 10) | 111      |

|                    |           |                      |                          |                        |        |
|--------------------|-----------|----------------------|--------------------------|------------------------|--------|
| Pyraclostrobin     | 6.46-6.80 | [M + H] <sup>+</sup> | 388.0>194.1 (17, 18)     | 388.0>163.1 (33, 14)   | 51     |
| Pyrazophos         | 6.51-6.85 | [M + H] <sup>+</sup> | 374.1>222.1 (29, 20)     | 374.1>194.1 (43, 20)   | 91     |
| Pyrimethanil       | 4.00-4.21 | [M + H] <sup>+</sup> | 200.2>107.1 (33, 10)     | 200.2>80.0 (39, 8)     | 41     |
| Quinalphos         | 5.73-6.03 | [M + H] <sup>+</sup> | 299.1>163.1 (33, 14)     | 299.1>147.1 (31, 14)   | 61     |
| Quinoclamine       | 1.40-1.65 | [M + H] <sup>+</sup> | 208.1> 105.0 (33, 10)    | 208.1> 89.0 (51, 8)    | 106    |
| Quizalofop-p-ethyl | 7.77-7.88 | [M + H] <sup>+</sup> | 373.0 > 299.0 (27, 26)   | 373.0 > 271.0 (35, 26) | 151    |
| Sulfotep           | 6.22-6.34 | [M + H] <sup>+</sup> | 323.0 > 96.9 (57, 10)    | 323.0 > 171.0 (21, 16) | 91     |
| Tebuconazole       | 5.98-6.29 | [M + H] <sup>+</sup> | 308.1>70.1 (57, 8)       | 308.1>125.1 (53, 12)   | 71     |
| Tebufenpyrad       | 7.80-8.20 | [M + H] <sup>+</sup> | 334.1>145.1 (39, 4)      | 334.1>117.1 (67, 6)    | 111    |
| Tebufenozide       | 5.73-6.03 | [M + H] <sup>+</sup> | 353.1>133.1 (25, 12)     | 353.1>297.1 (11, 28)   | 56     |
| Temephos           | 8.10-8.20 | [M + H] <sup>+</sup> | 466.9 > 418.9 (25, 34)   | 466.9 > 125.0 (41, 12) | 86     |
| Thiamethoxam       | 0.54-0.57 | [M + H] <sup>+</sup> | 292.1>211.1 (17, 20)     | 292.1>181.1 (31, 16)   | 76     |
| Thiobencarb        | 6.96-7.08 | [M + H] <sup>+</sup> | 258.0 > 125.0 (23, 12)   | 260.1 > 127.0 (25, 14) | 56     |
| Thiophanate methyl | 1.47-1.55 | [M + H] <sup>+</sup> | 343.0 > 151.1 (-29, -14) | 343.0 > 93.1 (69, 8)   | 86     |
| Tiacloprid         | 0.80-0.85 | [M + H] <sup>+</sup> | 253.3>126.0 (29, 12)     | 253.3>186.0 (21, 12)   | 101    |
| Triadimefon        | 4.67-4.91 | [M + H] <sup>+</sup> | 294.0>197.0 (21, 18)     | 294.0>225.0 (17, 20)   | 66     |
| Triadimenol        | 4.84-5.09 | [M + H] <sup>+</sup> | 296.1>70.1 (31, 8)       | 296.1>70.0 (33, 8)     | 46     |
| Triazophos         | 4.80-5.05 | [M + H] <sup>+</sup> | 314.1>97.0 (45, 10)      | 314.1>65.1 (85, 10)    | 81     |
| Trichlorfon        | 0.79-0.84 | [M + H] <sup>+</sup> | 257.0>109.0 (23, 10)     | 257.0>221.0 (15, 20)   | 101    |
| Tricyclazole       | 1.00-1.25 | [M + H] <sup>+</sup> | 190.1 > 163.0 (31, 14)   | 190.1 > 136.0 (39, 12) | 61     |
| Trifloxystrobin    | 7.20-7.57 | [M + H] <sup>+</sup> | 409.1 > 186.1 (23, 16)   | 409.1 > 145.1 (63, 14) | 66     |
| Triflumizole       | 7.12-7.48 | [M + H] <sup>+</sup> | 346.0>278.0 (15, 26)     | 346.0>73.1 (21, 8)     | 51     |
| Triforin           | 3.51-3.69 | [M + H] <sup>+</sup> | 434.9>389.8 (17, 36)     | 434.9>215.1 (37, 20)   | 56     |
| Triticonazole      | 5.45-5.60 | [M + H] <sup>+</sup> | 318.1 > 70.0 (43, 12)    | 318.1 > 69.9 (43, 12)  | 61, 71 |

Table 2. Validation parameters obtained for the optimized method: Average Recovery (%), Intermediate Precision (%), Measurement Uncertainty, Limit of Detection (LOD), Limit of Quantification (LOQ); and maximum residue levels (MRL) for pesticides in peanuts according to Brazilian legislation.

| Analyte             | 0.010 mg kg <sup>-1</sup> |      |      | 0.025 mg kg <sup>-1</sup> |      |      | 0.050 mg kg <sup>-1</sup> |      |      | 0.100 mg kg <sup>-1</sup> |      |      | LOD                 | LOQ                 | MRL                 |
|---------------------|---------------------------|------|------|---------------------------|------|------|---------------------------|------|------|---------------------------|------|------|---------------------|---------------------|---------------------|
|                     | Rec. %                    | CV   | U %  | Rec. %                    | CV   | U %  | Rec. %                    | CV   | U %  | Rec. %                    | CV%  | U %  | mg kg <sup>-1</sup> | mg kg <sup>-1</sup> | mg kg <sup>-1</sup> |
| Alachlor            | 94.9                      | 12.6 | 29.7 | 91.2                      | 10.4 | 14.4 | 98.0                      | 10.4 | 12.1 | 91.3                      | 9.30 | 11.9 | 0.0050              | 0.010               | 0.05                |
| Aldicarb sulfone    | 98.4                      | 10.8 | 54.0 | 103                       | 14.4 | 20.7 | 104                       | 13.9 | 13.8 | 91.5                      | 16.5 | 13.7 | 0.0050              | 0.010               | <i>c</i>            |
| Aldicarb sulfoxide  | 94.0                      | 15.1 | 41.2 | 91.7                      | 13.1 | 17.7 | 91.8                      | 8.70 | 13.2 | 84.8                      | 11.9 | 14.7 | 0.0050              | 0.010               | <i>c</i>            |
| Ametrine            | 91.1                      | 7.10 | 34.3 | 90.0                      | 10.5 | 15.4 | 95.0                      | 8.20 | 12.1 | 89.6                      | 7.60 | 11.9 | 0.0050              | 0.010               | <i>c</i>            |
| Avermectin B1a      | 94.3                      | 18.6 | 51.7 | 94.9                      | 12.5 | 19.7 | 94.0                      | 8.70 | 13.0 | 84.0                      | 15.6 | 13.4 | 0.0050              | 0.010               | <i>c</i>            |
| Azinphos ethyl      | 93.0                      | 11.5 | 39.7 | 93.5                      | 6.80 | 16.4 | 93.9                      | 8.30 | 12.3 | 93.8                      | 9.10 | 12.2 | 0.0050              | 0.010               | <i>a</i>            |
| Azinphos methyl     | 97.7                      | 13.8 | 27.8 | 94.4                      | 9.40 | 14   | 97.9                      | 6.50 | 11.7 | 97.9                      | 9.20 | 11.9 | 0.0050              | 0.010               | <i>b</i>            |
| Azoxystrobin        | 98.7                      | 9.60 | 37.3 | 101                       | 8.80 | 16   | 99.0                      | 8.90 | 12.3 | 105                       | 14.4 | 12.7 | 0.0050              | 0.010               | 0.2                 |
| Benalaxyl           | 94.2                      | 8.70 | 39.5 | 92.8                      | 11.0 | 16.7 | 93.7                      | 7.00 | 12.2 | 94.0                      | 8.40 | 12.2 | 0.0050              | 0.010               | <i>c</i>            |
| BF 500-3            | 91.2                      | 10.9 | 30.0 | 93.0                      | 12.4 | 15   | 93.0                      | 8.20 | 12.2 | 91.1                      | 12.7 | 12.8 | 0.0050              | 0.010               | 0.1                 |
| Bitertanol          | 93.8                      | 8.20 | 23.6 | 91.9                      | 7.60 | 13.3 | 95.6                      | 8.80 | 11.9 | 91.0                      | 7.70 | 11.9 | 0.0050              | 0.010               | 0.2                 |
| Boscalid            | 95.7                      | 6.10 | 26.7 | 93.5                      | 8.80 | 13.9 | 97.1                      | 7.60 | 11.9 | 92.6                      | 7.30 | 11.9 | 0.0050              | 0.010               | <i>c</i>            |
| Buprofezin          | 81.9                      | 15.6 | 47.7 | 91.2                      | 11.8 | 18.7 | 95.0                      | 9.60 | 12.9 | 86.8                      | 23.6 | 14.6 | 0.0050              | 0.010               | <i>c</i>            |
| Cadusafos           | 90.2                      | 8.70 | 33.4 | 88.7                      | 6.40 | 15.2 | 88.6                      | 9.00 | 12.3 | 88.6                      | 10.5 | 12.6 | 0.0050              | 0.010               | <i>c</i>            |
| Carbaryl            | 103                       | 9.70 | 30.5 | 95.2                      | 8.30 | 14.6 | 95.6                      | 7.70 | 12.1 | 94.0                      | 10.0 | 12.3 | 0.0050              | 0.010               | <i>c</i>            |
| Carbendazim         | 102                       | 11.5 | 50.0 | 92.7                      | 15.6 | 19.7 | 97.4                      | 10.6 | 13.1 | 98.6                      | 13.9 | 13.1 | 0.0050              | 0.010               | <i>c</i>            |
| Carbofuran          | 118                       | 8.30 | 30.6 | 111                       | 9.70 | 14.7 | 112                       | 5.10 | 11.8 | 106                       | 8.80 | 12.0 | 0.0050              | 0.010               | 0.1                 |
| Carpropamid         | 95.3                      | 12.8 | 33.4 | 94.5                      | 8.80 | 15.3 | 94.9                      | 4.50 | 12.1 | 92.8                      | 12.0 | 12.9 | 0.0050              | 0.010               | <i>c</i>            |
| Chlorfenvinphos     | 89.2                      | 11.4 | 42.9 | 92.4                      | 7.90 | 17.5 | 97.3                      | 7.30 | 12.6 | 95.4                      | 12.8 | 12.7 | 0.0050              | 0.010               | <i>a</i>            |
| Chlorpyrifos methyl | 89.2                      | 13.9 | 25.6 | 92.2                      | 11.0 | 14.1 | 88.3                      | 9.40 | 12.1 | 86.3                      | 7.80 | 11.9 | 0.0050              | 0.010               | <i>b</i>            |
| Ciflufenamide       | 98.1                      | 5.90 | 33.3 | 94.8                      | 6.90 | 15.7 | 95.9                      | 8.50 | 12.6 | 93.2                      | 9.90 | 12.6 | 0.0050              | 0.010               | <i>b</i>            |
| Clorbufan           | 97.9                      | 11.8 | 44.1 | 88.2                      | 10.7 | 18.1 | 97.2                      | 11.0 | 13.1 | 89.6                      | 10.5 | 12.8 | 0.0050              | 0.010               | <i>b</i>            |
| Cloroxuron          | 97.9                      | 12.2 | 30.8 | 95.2                      | 7.70 | 14.8 | 98.8                      | 6.70 | 12.1 | 94.2                      | 11.7 | 12.5 | 0.0050              | 0.010               | <i>b</i>            |
| Cyazofamid          | 99.5                      | 9.20 | 34.6 | 90.9                      | 6.90 | 15.5 | 99.5                      | 8.20 | 12.3 | 91.4                      | 7.40 | 12.2 | 0.0050              | 0.010               | <i>c</i>            |
| Cyhalofop-butyl     | 99.9                      | 6.30 | 36.5 | 95.1                      | 9.10 | 16.2 | 95.4                      | 6.90 | 12.4 | 93.3                      | 7.50 | 12.2 | 0.0050              | 0.010               | <i>c</i>            |
| Cyproconazole       | 94.1                      | 11.7 | 27.9 | 89.5                      | 8.60 | 14.0 | 93.5                      | 5.80 | 11.7 | 90.7                      | 10.2 | 11.9 | 0.0050              | 0.010               | <i>c</i>            |

|                    |      |      |      |      |      |      |      |      |      |      |      |      |        |       |          |
|--------------------|------|------|------|------|------|------|------|------|------|------|------|------|--------|-------|----------|
| Cyprodinil         | 83.1 | 10.7 | 30.5 | 84.8 | 6.90 | 14.5 | 86.1 | 8.60 | 12   | 83.4 | 8.40 | 11.9 | 0.0050 | 0.010 | <i>c</i> |
| Desmedipham        | 99.8 | 9.00 | 29.8 | 96.1 | 7.90 | 14.5 | 97.3 | 6.50 | 12   | 94.0 | 7.40 | 12.0 | 0.0050 | 0.010 | <i>b</i> |
| Diazinon           | 88.6 | 8.40 | 27   | 90.8 | 10.2 | 14.1 | 89.9 | 4.90 | 11.7 | 91.3 | 10.3 | 12.0 | 0.0050 | 0.010 | <i>c</i> |
| Dicrotophos        | 100  | 12.8 | 49.6 | 97.1 | 12.8 | 19.3 | 99.1 | 8.40 | 12.8 | 89.7 | 14.0 | 13.1 | 0.0050 | 0.010 | <i>a</i> |
| Difenoconazole     | 97.1 | 10.8 | 31.8 | 93.6 | 8.50 | 15.0 | 96.6 | 8.90 | 12.4 | 92.1 | 9.70 | 12.8 | 0.0050 | 0.010 | 0.1      |
| Diflufenicam       | 92.2 | 10.5 | 40.5 | 93.3 | 8.80 | 17.1 | 92.1 | 6.90 | 12.6 | 91.7 | 13.1 | 13.0 | 0.0050 | 0.010 | <i>c</i> |
| Diniconazole       | 94.2 | 7.20 | 32.1 | 89.4 | 6.70 | 15.0 | 91.2 | 6.40 | 12.1 | 88.4 | 9.70 | 12.2 | 0.0050 | 0.010 | <i>b</i> |
| Disulfoton         | 85.7 | 8.70 | 27.1 | 79.4 | 8.70 | 13.9 | 82.4 | 9.10 | 12.0 | 79.0 | 8.70 | 11.9 | 0.0050 | 0.010 | <i>c</i> |
| Disulfoton sulfone | 102  | 8.20 | 26.4 | 100  | 5.80 | 13.7 | 98.5 | 6.20 | 11.8 | 101  | 9.50 | 12.1 | 0.0050 | 0.010 | <i>c</i> |
| Diuron             | 94.3 | 6.00 | 28.1 | 94.3 | 7.40 | 13.9 | 98.0 | 6.40 | 11.7 | 91.5 | 8.20 | 11.8 | 0.0050 | 0.010 | <i>c</i> |
| Ethiprole          | 94.6 | 10.2 | 38.8 | 101  | 6.90 | 16.5 | 101  | 6.30 | 12.6 | 97.1 | 10.6 | 13.3 | 0.0050 | 0.010 | <i>c</i> |
| Ethofumesate       | 95.2 | 7.30 | 43.7 | 95.7 | 10.7 | 17.6 | 101  | 11.5 | 12.8 | 97.5 | 12.1 | 12.7 | 0.0050 | 0.010 | <i>b</i> |
| Ethoprosfos        | 98.2 | 8.50 | 38.6 | 89.3 | 5.30 | 16.4 | 92.4 | 7.20 | 12.5 | 85.5 | 7.10 | 13.0 | 0.0050 | 0.010 | <i>c</i> |
| Ethyl cinidon      | 93.5 | 11.0 | 44.2 | 90.9 | 12.0 | 18.1 | 90.4 | 9.30 | 12.9 | 84.0 | 12.7 | 13.1 | 0.0050 | 0.010 | <i>b</i> |
| Etione             | 96.4 | 9.10 | 52.6 | 89.6 | 12.0 | 20.2 | 92.2 | 10.9 | 13.4 | 82.2 | 23.4 | 15.0 | 0.0050 | 0.010 | <i>c</i> |
| Etrimfos           | 89.5 | 8.30 | 33.4 | 90.1 | 6.00 | 15   | 92.2 | 6.40 | 11.9 | 86.4 | 7.70 | 11.9 | 0.0050 | 0.010 | <i>a</i> |
| Fenamidone         | 88.6 | 11.6 | 32.7 | 84.1 | 11.3 | 15.3 | 87.3 | 9.60 | 12.3 | 83.5 | 10.2 | 12.3 | 0.0050 | 0.010 | <i>c</i> |
| Fenamiphos         | 92.9 | 10.9 | 26.1 | 90   | 11.1 | 14.1 | 93.9 | 8.50 | 12   | 90.6 | 8.20 | 12.1 | 0.0050 | 0.010 | <i>c</i> |
| Fenarimol          | 94.6 | 9.80 | 31.5 | 86.7 | 7.10 | 14.8 | 92.6 | 10.1 | 12.3 | 91.6 | 13.1 | 12.5 | 0.0050 | 0.010 | <i>c</i> |
| Fenhexamide        | 86.9 | 11.9 | 32.7 | 85.6 | 10.3 | 15.2 | 86.7 | 9.80 | 12.3 | 84.3 | 10.5 | 12.3 | 0.0050 | 0.010 | <i>b</i> |
| Fenthion           | 91.3 | 11.8 | 30.9 | 89.5 | 12.3 | 15.1 | 87.8 | 9.30 | 12.3 | 90.8 | 9.70 | 12.5 | 0.0050 | 0.010 | <i>c</i> |
| Fluasifop-p-butyl  | 94.2 | 9.20 | 44   | 87.0 | 8.60 | 17.8 | 93.3 | 6.80 | 12.6 | 88.7 | 15.4 | 13.3 | 0.0050 | 0.010 | <i>c</i> |
| Fluzilazol         | 93.1 | 8.70 | 37.1 | 90.6 | 7.50 | 16.1 | 92.5 | 8.10 | 12.4 | 92.1 | 9.40 | 12.6 | 0.0050 | 0.010 | <i>b</i> |
| Furathiocarb       | 94.0 | 11.0 | 37.6 | 87.4 | 7.10 | 16.1 | 87.8 | 6.70 | 12.3 | 80.5 | 13.5 | 13.0 | 0.0050 | 0.010 | <i>c</i> |
| Imazalil           | 87.0 | 11.3 | 45.8 | 85.7 | 6.30 | 18.2 | 84.0 | 6.20 | 12.6 | 82.0 | 9.30 | 12.5 | 0.0050 | 0.010 | <i>c</i> |
| Indoxacarb         | 98.5 | 9.40 | 25.8 | 95.4 | 9.10 | 13.8 | 98.2 | 5.70 | 11.8 | 92.6 | 8.70 | 12.2 | 0.0050 | 0.010 | <i>c</i> |
| Iprovalicarb       | 94.1 | 7.80 | 23.6 | 95.8 | 8.90 | 13.4 | 96.8 | 6.00 | 11.7 | 94.4 | 8.70 | 11.9 | 0.0050 | 0.010 | <i>c</i> |
| Isoproturon        | 99.5 | 5.40 | 23.8 | 93.2 | 5.00 | 13.2 | 95.7 | 5.30 | 11.7 | 92.0 | 8.30 | 12.0 | 0.0050 | 0.010 | <i>b</i> |
| Kresoxim methyl    | 96.8 | 19.2 | 34.9 | 96.1 | 13.9 | 16   | 101  | 8.90 | 12.3 | 100  | 17.3 | 13.3 | 0.0050 | 0.010 | <i>c</i> |
| Linuron            | 87.5 | 10.0 | 27.1 | 87.6 | 6.00 | 13.8 | 94.0 | 6.50 | 11.8 | 89.4 | 8.80 | 12.0 | 0.0050 | 0.010 | <i>c</i> |
| Malathion          | 96.6 | 9.20 | 28.9 | 92.5 | 6.60 | 14.1 | 94.3 | 7.50 | 11.9 | 94.1 | 7.10 | 11.9 | 0.0050 | 0.010 | <i>c</i> |

|                   |       |      |      |      |      |      |      |      |      |      |      |      |        |       |          |
|-------------------|-------|------|------|------|------|------|------|------|------|------|------|------|--------|-------|----------|
| Metazachlor       | 97.7  | 9.10 | 26.8 | 93.6 | 7.30 | 13.9 | 95.3 | 4.90 | 11.8 | 90.7 | 8.70 | 12.0 | 0.0050 | 0.010 | <i>b</i> |
| Methidation       | 97.9  | 10.7 | 29.7 | 95.7 | 10.5 | 14.6 | 95.4 | 5.70 | 11.9 | 91.7 | 10.0 | 12.3 | 0.0050 | 0.010 | <i>c</i> |
| Methiocarb        | 93.9  | 8.40 | 27.4 | 91.2 | 6.80 | 13.8 | 93.3 | 5.10 | 11.7 | 89.8 | 7.60 | 11.7 | 0.0050 | 0.010 | <i>c</i> |
| Methoxyfenozide   | 103.7 | 10.2 | 32   | 94.2 | 7.30 | 15.1 | 95.6 | 6.10 | 12.3 | 96.4 | 12.8 | 13.0 | 0.0050 | 0.010 | <i>c</i> |
| Meticonazol       | 90.3  | 7.70 | 33   | 92.9 | 9.00 | 15.3 | 94.1 | 10.6 | 12.4 | 90.2 | 10.6 | 12.4 | 0.0050 | 0.010 | 0.20     |
| Monocrotophos     | 94.9  | 10.2 | 45.3 | 94.6 | 11.2 | 18.1 | 98.9 | 6.90 | 12.5 | 86.4 | 14.1 | 13.3 | 0.0050 | 0.010 | <i>a</i> |
| Monolinuron       | 95.2  | 7.10 | 29.4 | 91.3 | 9.10 | 14.4 | 96.7 | 5.70 | 11.9 | 92.2 | 7.10 | 12.0 | 0.0050 | 0.010 | <i>b</i> |
| Myclobutanil      | 106.7 | 11.8 | 37.9 | 91.9 | 7.40 | 16.1 | 93.1 | 8.00 | 12.3 | 92.6 | 8.90 | 12.4 | 0.0050 | 0.010 | <i>c</i> |
| Nuarimol          | 97.0  | 8.80 | 38.0 | 90.6 | 6.50 | 16.1 | 92.2 | 7.10 | 12.3 | 87.8 | 6.90 | 12.1 | 0.0050 | 0.010 | <i>b</i> |
| Omethoate         | 89.0  | 10.5 | 39.6 | 87.6 | 11.2 | 16.8 | 93.1 | 8.70 | 12.5 | 81.9 | 12.0 | 13.0 | 0.0050 | 0.010 | <i>a</i> |
| Oxamyl            | NQ*   | NQ*  | NQ*  | 93.1 | 17.1 | 19.2 | 96.4 | 10.0 | 13.3 | 93.5 | 13.7 | 13.2 | 0.010  | 0.025 | <i>a</i> |
| Paclobutrazol     | 97.3  | 10.1 | 35.3 | 90.7 | 9.00 | 15.7 | 90.8 | 7.20 | 12.2 | 90.6 | 8.50 | 12.2 | 0.0050 | 0.010 | <i>c</i> |
| Pencicurom        | 93.9  | 11.2 | 35.4 | 90.5 | 9.10 | 15.6 | 92.5 | 9.20 | 12.3 | 86.5 | 11.0 | 12.5 | 0.0050 | 0.010 | <i>c</i> |
| Penconazole       | 82.9  | 10.5 | 30.4 | 87.9 | 10.5 | 14.8 | 92.1 | 7.20 | 12.1 | 84.0 | 9.90 | 12.2 | 0.0050 | 0.010 | <i>b</i> |
| Pendimethalin     | 85.1  | 9.70 | 27.9 | 81.5 | 9.40 | 14.1 | 87.6 | 9.40 | 12   | 78.8 | 6.50 | 11.8 | 0.0050 | 0.010 | 0.1      |
| Phenthoate        | 94.6  | 8.90 | 45.8 | 94.1 | 7.50 | 18.2 | 95.6 | 7.40 | 12.8 | 94.2 | 9.10 | 12.9 | 0.0050 | 0.010 | <i>c</i> |
| Phosalone         | 94.4  | 9.90 | 31.6 | 90.1 | 7.70 | 14.9 | 92.6 | 6.00 | 12   | 89.4 | 12.5 | 12.5 | 0.0050 | 0.010 | <i>c</i> |
| Phosmet           | 96.8  | 9.00 | 31.0 | 91.4 | 7.30 | 14.6 | 96.5 | 5.60 | 11.9 | 91.4 | 7.70 | 12.0 | 0.0050 | 0.010 | <i>c</i> |
| Picolinafen       | 91.1  | 11.3 | 50.0 | 88.2 | 14.5 | 19.8 | 92.8 | 9.10 | 13.1 | 81.6 | 21.0 | 14.3 | 0.0050 | 0.010 | <i>b</i> |
| Piriftalide       | 96.8  | 5.60 | 28.2 | 94.0 | 6.70 | 14.1 | 94.4 | 4.50 | 11.8 | 91.4 | 8.20 | 11.9 | 0.0050 | 0.010 | <i>b</i> |
| Pirimicarb        | 93.5  | 6.70 | 29.5 | 93.1 | 6.50 | 14.2 | 95.8 | 4.70 | 11.8 | 91.1 | 8.20 | 12.0 | 0.0050 | 0.010 | <i>c</i> |
| Pirimiphos methyl | 85.2  | 8.20 | 30.1 | 86.6 | 7.40 | 14.4 | 87.2 | 4.60 | 11.9 | 86.2 | 10.7 | 12.6 | 0.0050 | 0.010 | <i>c</i> |
| Prochloraz        | 92.0  | 11.4 | 42.1 | 93.7 | 10.9 | 17.5 | 94.2 | 7.60 | 12.7 | 90.3 | 13.4 | 13.4 | 0.0050 | 0.010 | <i>c</i> |
| Propham           | 99.1  | 15.0 | 33.7 | 90.2 | 11.0 | 15.6 | 92.1 | 8.40 | 12.4 | 94.1 | 14.1 | 13.0 | 0.0050 | 0.010 | <i>b</i> |
| Profenofos        | 94.8  | 9.80 | 39.8 | 86.5 | 6.50 | 16.7 | 87.3 | 7.00 | 12.4 | 85.0 | 13.4 | 12.8 | 0.0050 | 0.010 | 0.02     |
| Promecarb         | 96.5  | 8.10 | 30.5 | 94.6 | 8.40 | 14.6 | 95.7 | 5.40 | 11.9 | 91.7 | 7.50 | 12.0 | 0.0050 | 0.010 | <i>b</i> |
| Propaquizafop     | 90.9  | 10.7 | 52.9 | 90.1 | 12.9 | 20.3 | 97.8 | 11.3 | 13.5 | 80.6 | 15.3 | 13.7 | 0.0050 | 0.010 | <i>c</i> |
| Propiconazole     | 95.3  | 8.40 | 26.4 | 89.6 | 6.70 | 13.8 | 93.5 | 7.80 | 11.9 | 87.1 | 10.5 | 12.2 | 0.0050 | 0.010 | 0.05     |
| Propoxur          | 102.4 | 14.4 | 34.8 | 95.8 | 12.5 | 16.0 | 97.8 | 6.10 | 12.2 | 95.1 | 9.90 | 12.4 | 0.0050 | 0.010 | <i>c</i> |
| Propyzamide       | 87.9  | 8.30 | 36.9 | 88.2 | 9.50 | 16.2 | 93.6 | 6.90 | 12.4 | 88.0 | 8.20 | 12.6 | 0.0050 | 0.010 | <i>b</i> |
| Pyraclofos        | 94.2  | 10.8 | 32.6 | 93.0 | 10.1 | 15.3 | 93.4 | 7.10 | 12.2 | 91.0 | 10.3 | 12.4 | 0.0050 | 0.010 | <i>b</i> |

|                    |      |      |      |      |      |      |      |      |      |      |      |      |        |       |          |
|--------------------|------|------|------|------|------|------|------|------|------|------|------|------|--------|-------|----------|
| Pyraclostrobin     | 104  | 13.2 | 53.9 | 89.6 | 6.60 | 20   | 87.0 | 9.30 | 13.1 | 86.9 | 15.2 | 13.5 | 0.0050 | 0.010 | 0.1      |
| Pyrazophos         | 97.6 | 15.5 | 42.7 | 90.1 | 9.20 | 17.5 | 93.6 | 8.00 | 12.7 | 93.0 | 10.5 | 12.9 | 0.0050 | 0.010 | <i>c</i> |
| Pyrimethanil       | 86.1 | 13.9 | 32.5 | 84.9 | 8.30 | 15   | 84.6 | 6.40 | 12   | 83.8 | 7.50 | 12.3 | 0.0050 | 0.010 | <i>c</i> |
| Quinalphos         | 87.9 | 6.30 | 31.3 | 91.1 | 9.80 | 14.8 | 91.6 | 10.1 | 12.2 | 90.0 | 10.3 | 12.2 | 0.0050 | 0.010 | <i>b</i> |
| Quinoclamine       | 90.9 | 17.1 | 48.7 | 88.9 | 13.2 | 19.3 | 85.1 | 13.9 | 13.5 | 85.8 | 11.8 | 12.9 | 0.0050 | 0.010 | <i>b</i> |
| Quizalofop-p-ethyl | 92.6 | 10.8 | 43.8 | 86.3 | 8.70 | 17.8 | 90.9 | 7.10 | 12.7 | 85.2 | 15.8 | 13.4 | 0.0050 | 0.010 | 0.05     |
| Sulfotep           | 96.7 | 11.1 | 42.9 | 91.4 | 8.00 | 17.4 | 91.5 | 6.10 | 12.5 | 91.1 | 7.50 | 12.7 | 0.0050 | 0.010 | <i>b</i> |
| Tebuconazole       | 92.2 | 11.1 | 34.0 | 89.4 | 8.40 | 15.4 | 95.3 | 7.30 | 12.2 | 88.4 | 8.20 | 12.0 | 0.0050 | 0.010 | 0.1      |
| Tebufenpyrad       | 88.0 | 6.90 | 29.2 | 89.7 | 6.40 | 14.1 | 91.3 | 6.30 | 11.8 | 85.6 | 4.80 | 11.8 | 0.0050 | 0.010 | <i>b</i> |
| Tebufenozide       | 98.3 | 11.0 | 36.4 | 95.6 | 7.90 | 16.2 | 95.4 | 8.60 | 12.6 | 96.3 | 9.40 | 12.7 | 0.0050 | 0.010 | <i>c</i> |
| Temephos           | 94.6 | 12.5 | 52.8 | 92.0 | 12.6 | 20.2 | 99.4 | 11.7 | 13.4 | 81.4 | 10.1 | 13.2 | 0.0050 | 0.010 | <i>c</i> |
| Tetraconazole      | 100  | 12.0 | 35.1 | 93.2 | 10.2 | 15.6 | 94.3 | 6.80 | 12   | 95.8 | 13.6 | 12.5 | 0.0050 | 0.010 | <i>c</i> |
| Thiamethoxam       | 99.8 | 12.6 | 49.6 | 97.6 | 18.7 | 19.8 | 103  | 12.6 | 13.2 | 88.4 | 19.4 | 13.9 | 0.0050 | 0.010 | 0.02     |
| Thiobencarb        | 89.0 | 8.50 | 26.2 | 85.4 | 8.90 | 13.7 | 87.4 | 6.50 | 11.7 | 81.9 | 10.0 | 11.9 | 0.0050 | 0.010 | <i>c</i> |
| Thiophanate methyl | 102  | 13.5 | 42.6 | 92.1 | 13.2 | 17.5 | 102  | 10.0 | 12.6 | 96.0 | 10.5 | 12.5 | 0.0050 | 0.010 | 0.1      |
| Tiacloprid         | 98.0 | 16.8 | 54.7 | 98.6 | 12.6 | 20.6 | 102  | 10.0 | 13.2 | 88.5 | 19.1 | 14.0 | 0.0050 | 0.010 | <i>c</i> |
| Triadimefon        | 89.4 | 11.6 | 42.7 | 91.6 | 9.00 | 17.3 | 93.4 | 9.30 | 12.5 | 91.3 | 10.8 | 12.5 | 0.0050 | 0.010 | <i>c</i> |
| Triadimenol        | 101  | 10.1 | 34.1 | 93.7 | 8.50 | 15.2 | 92.9 | 7.50 | 12   | 89.8 | 9.50 | 12.1 | 0.0050 | 0.010 | <i>c</i> |
| Triazophos         | 102  | 9.80 | 35.3 | 91.4 | 7.20 | 15.4 | 90.6 | 7.40 | 12.1 | 87.3 | 7.90 | 12.0 | 0.0050 | 0.010 | <i>c</i> |
| Trichlorfon        | 94.4 | 14.5 | 48.5 | 97.5 | 14.7 | 19.1 | 102  | 9.30 | 12.8 | 92.5 | 19.6 | 13.9 | 0.0050 | 0.010 | <i>a</i> |
| Tricyclazole       | NQ*  | NQ*  | NQ*  | 88.7 | 12.9 | 23.6 | 86.9 | 12.2 | 14.2 | 86.4 | 16.2 | 14.2 | 0.010  | 0.025 | <i>c</i> |
| Trifloxystrobin    | 99.3 | 8.60 | 35.7 | 92.2 | 7.80 | 15.6 | 94.2 | 3.90 | 11.9 | 95.8 | 12.9 | 12.5 | 0.0050 | 0.010 | 0.05     |
| Triflumizole       | 98.7 | 5.30 | 25.7 | 89.4 | 6.20 | 13.4 | 91.0 | 6.50 | 11.7 | 90.8 | 11.0 | 12.0 | 0.0050 | 0.010 | <i>c</i> |
| Triforin           | 101  | 9.60 | 36.9 | 94.1 | 8.70 | 16   | 98.4 | 6.50 | 12.2 | 98.3 | 8.90 | 12.2 | 0.0050 | 0.010 | <i>c</i> |
| Triticonazole      | 92.3 | 9.40 | 34.3 | 87.8 | 7.40 | 15.4 | 90.7 | 6.70 | 12.1 | 88.4 | 11.9 | 12.6 | 0.0050 | 0.010 | <i>c</i> |

NQ\* Not quantifiable

*a. prohibited*

*b. use not legislated in Brazil*

*c. use not allowed for peanut crops*
